# Supplementary material for: Deubiquitinating Enzyme USP8 Is Essential for Skeletogenesis by Regulating Wnt Signaling
Source: MDPI journal article supplement (doi:10.3390/ijms221910289), 2021-09-24
Supplement: s1 [file s1]

## **Supplementary Materials**

# **Deubiquitinating Enzyme USP8 is Essential for Skeletogenesis by Regulating Wnt Signaling**

Sachin Chaugule <sup>1</sup>, Jung-Min Kim <sup>1</sup>, Yeon-Suk Yang <sup>1</sup>, Klaus-Peter Knobeloch <sup>2</sup>, Xi He <sup>3</sup> and Jae-Hyuck Shim <sup>1,4,5, \*</sup>

1 Shim lab, Division of Rheumatology, Department of Medicine, University of Massachusetts Chan Medical School, Worcester, MA 01605, USA; sachin.chaugule@umassmed.edu (S.C.); jungmin.kim@umassmed.edu (J.-M.K.); yen.yang@umassmed.edu (Y.-S.Y.)

2 Institute of Neuropathology, Medical Faculty, University of Freiburg, 79106 Freiburg, Germany; klaus-peter.knobeloch@uniklinik-freiburg.de

3 F. M. Kirby Neurobiology Center, Boston Children's Hospital, Department of Neurology, Harvard Medical School, Boston, MA 02115, USA; xi.he@childrens.harvard.edu

4 Horae Gene Therapy Center, University of Massachusetts Chan Medical School, Worcester, MA 01605, USA

5 Li Weibo Institute for Rare Diseases Research, University of Massachusetts Chan Medical School, Worcester, MA 01605, USA

**Supplementary Figure S1: *Usp8<sup>Osx</sup>* mice display impaired ossification during skeletogenesis**

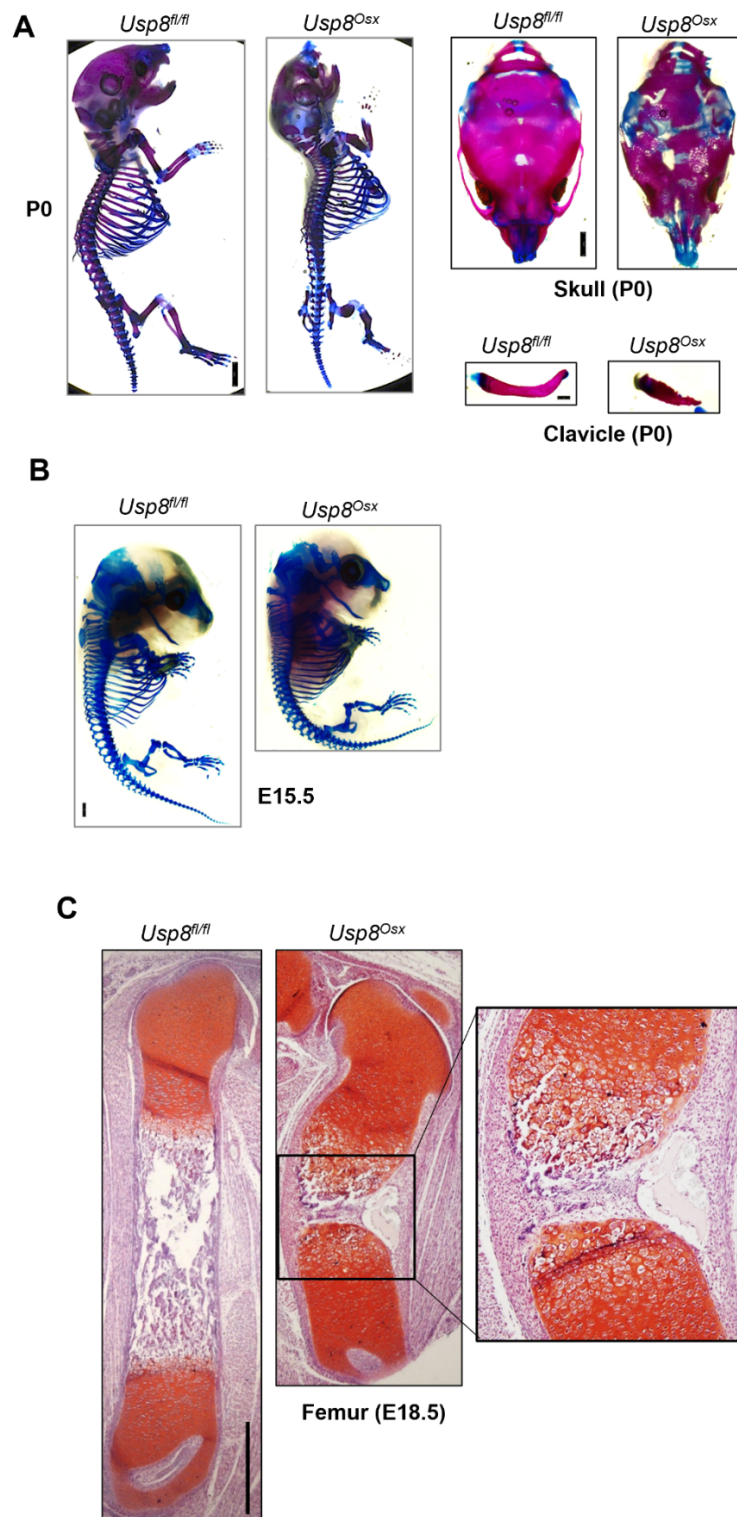

(A) Alizarin red/alcan blue staining of skeletal preparations of the whole body, skulls, and clavicles of P0 *Usp8<sup>fl/fl</sup>* and *Usp8<sup>O/sx</sup>* embryos. Scale bar, 1 mm. (B) Alizarin red/alcan blue staining of skeletal preparations of the whole body of E15.5 *Usp8<sup>fl/fl</sup>* and *Usp8<sup>O/sx</sup>* embryos. Scale bar, 1 mm. (C) Safranin O-stained longitudinal sections of E18.5 *Usp8<sup>fl/fl</sup>* and *Usp8<sup>O/sx</sup>* femurs. Scale bar, 250  $\mu$ m (left) and 100  $\mu$ m (right, enlarged inset image).

## Supplementary Figure S2: Isolation of mouse SSCs using flow cytometry

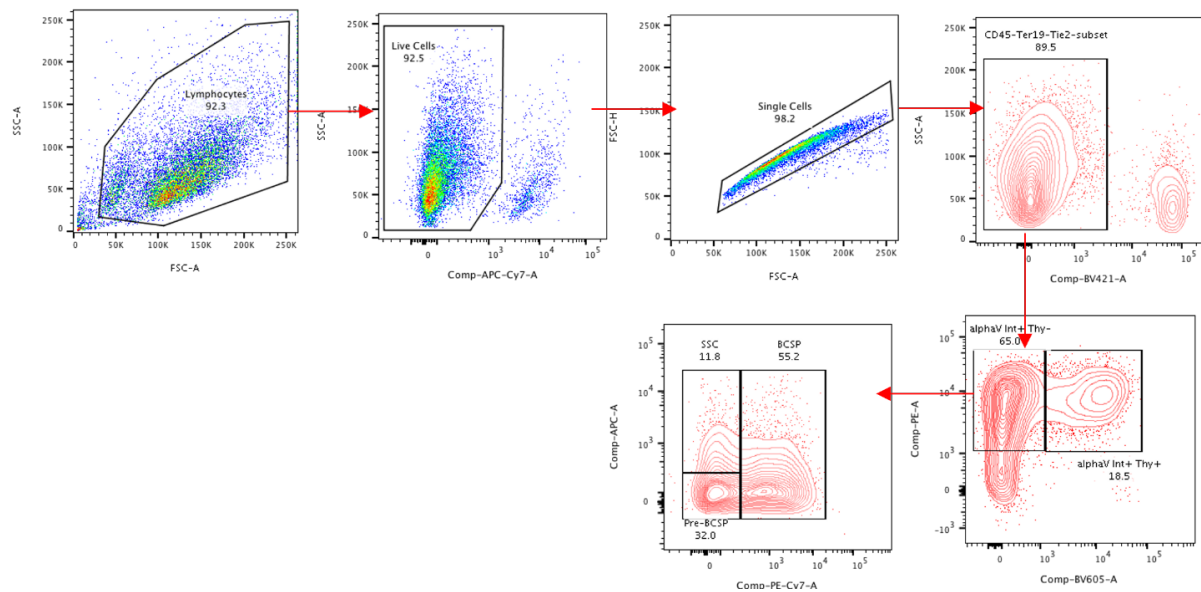

(A) Representative flow cytometry dot plots showing the gating strategy to isolate mouse skeletal stem cells (SSCs) from E18.5 *Usp8<sup>fl/fl</sup>* embryonic limbs. Dot plots showing the different populations while applying the gating strategy, such as BCSP (bone, cartilage, and stromal progenitor, CD45<sup>-</sup>Ter119<sup>-</sup>Tie2<sup>-</sup> $\alpha$ VInt<sup>+</sup>Thy<sup>+</sup>CD105<sup>+</sup>); pre-BCSP (pre-bone cartilage and stromal progenitor, CD45<sup>-</sup>Ter119<sup>-</sup>Tie2<sup>-</sup> $\alpha$ VInt<sup>+</sup>Thy<sup>-</sup>CD105<sup>-</sup>CD200<sup>-</sup>) and SSC (skeletal stem cell, CD45<sup>-</sup>Ter119<sup>-</sup>Tie2<sup>-</sup> $\alpha$ VInt<sup>+</sup>Thy<sup>-</sup>CD105<sup>-</sup>CD200<sup>+</sup>). A similar strategy was used to isolate SSCs from E18.5 *Usp8<sup>Oss</sup>* embryonic limbs.

**Supplementary Figure S3: The impaired osteogenic potential of *Usp8<sup>Osx</sup>* calvarial osteoblasts.**

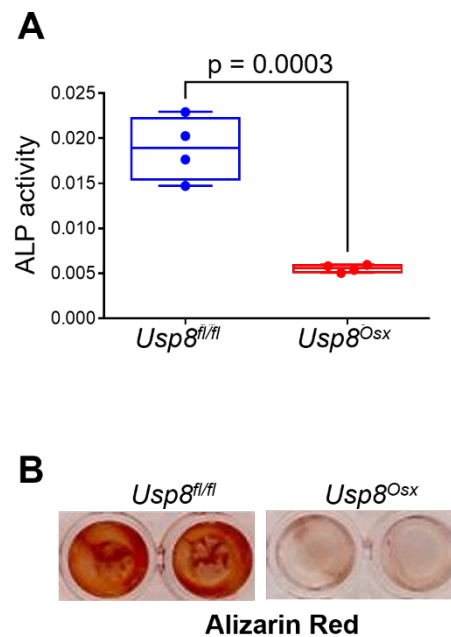

(A, B) Primary calvarial osteoblasts (COBs) isolated from *Usp8<sup>fl/fl</sup>* and *Usp8<sup>Osx</sup>* neonates at postnatal day 0 were cultured under osteogenic conditions for 6 days, and ALP activity (A) and alizarin red staining (B) were performed to assess early and late osteoblast differentiation, respectively. Data are shown as a box-and-whisker plot (with median and interquartile ranges) from min to max, with all data points shown. Analysis was performed using the unpaired Student's t-test within Prism.

**Supplementary Table S1: Number of offspring derived from the breeding of *Usp8<sup>fl/fl</sup>* and *Usp8<sup>fl/+</sup>;Osx-cre* mice**

| Age | <i>Usp8<sup>fl/fl</sup></i> | <i>Usp8<sup>fl/+</sup>;Osx</i> | <i>Usp8<sup>fl/fl</sup>;Osx</i> | Total |
|-----|-----------------------------|--------------------------------|---------------------------------|-------|
| P0  | 70                          | 23                             | 23                              | 116   |
| P21 | 124                         | 46                             | 0                               | 170   |

**Supplementary Table S2: Primer Sequences**

| Gene                | Forward                   | Reverse                  |
|---------------------|---------------------------|--------------------------|
| Mouse <i>Usp8</i>   | CGCAATCATCTCCTTCCATT      | GATTTGGGAGAAGTAGCCCC     |
| Mouse <i>Colla1</i> | ACTGTCCCAACCCCCAAAG       | ACGTATTCTTCCGGGCAGAA     |
| Mouse <i>Opn</i>    | TGCACCCAGATCCTATAGCC      | CTCCATCGTCATCATCATCG     |
| Mouse <i>Osx</i>    | ATGGCGTCCTCTCTGCTTGA      | GAAGGGTGGGTAGTCATTTG     |
| Mouse <i>Runx2</i>  | TACAAACCATACCCAGTCCCTGTTT | AGTGCTCTAACCACAGTCCATGCA |
